# Supplementary material
Source: Springer Nature journal article supplement (https://www.springermedizin.de/resource/supplementary/12877_2014_1058_MOESM3_ESM.pdf/9440724)

### A Trail Making Test part A (TMT-A)

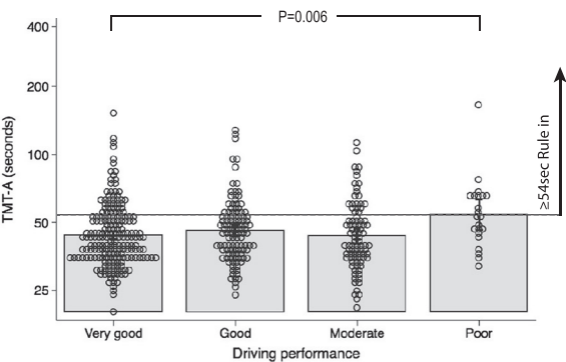

### B Trail Making Test part B (TMT-B)

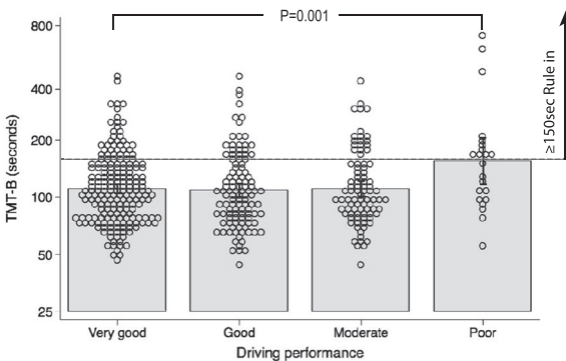

### C Montreal Cognitive Assessment (MoCA)

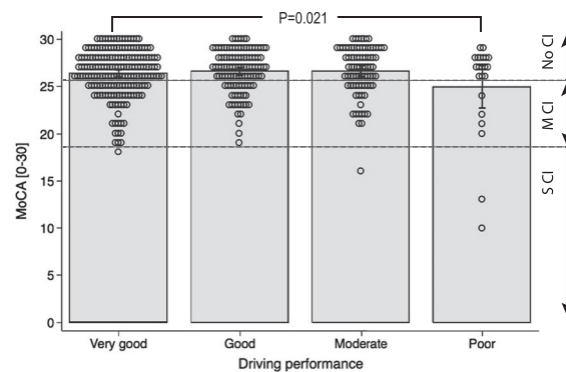

Supplement: MOESM3 [file 9440724]
